# Supplementary material
Source: PubMed Central journal article supplement (PMC3102544)

Data Supplement Figure 1

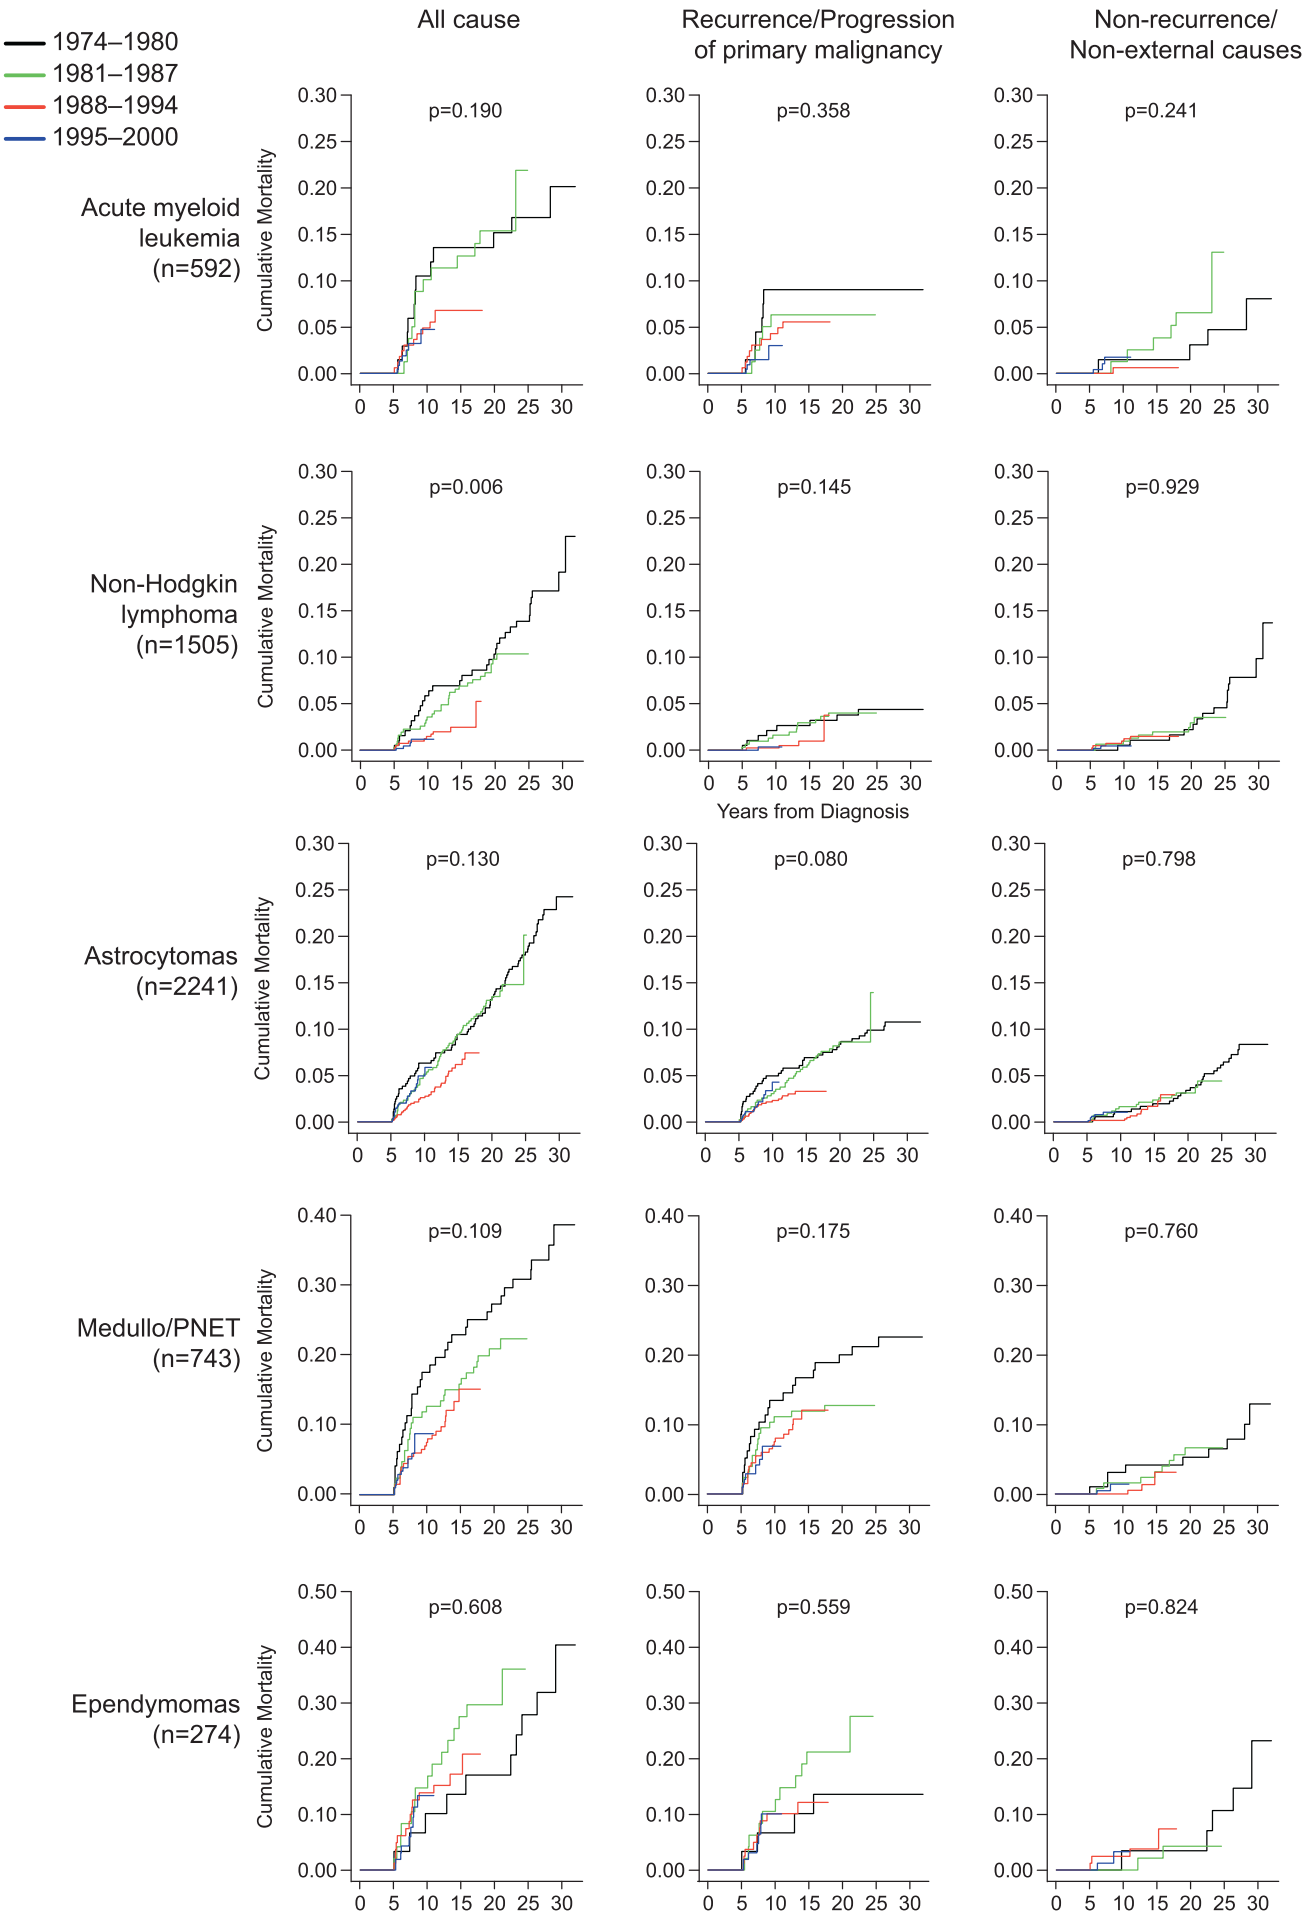

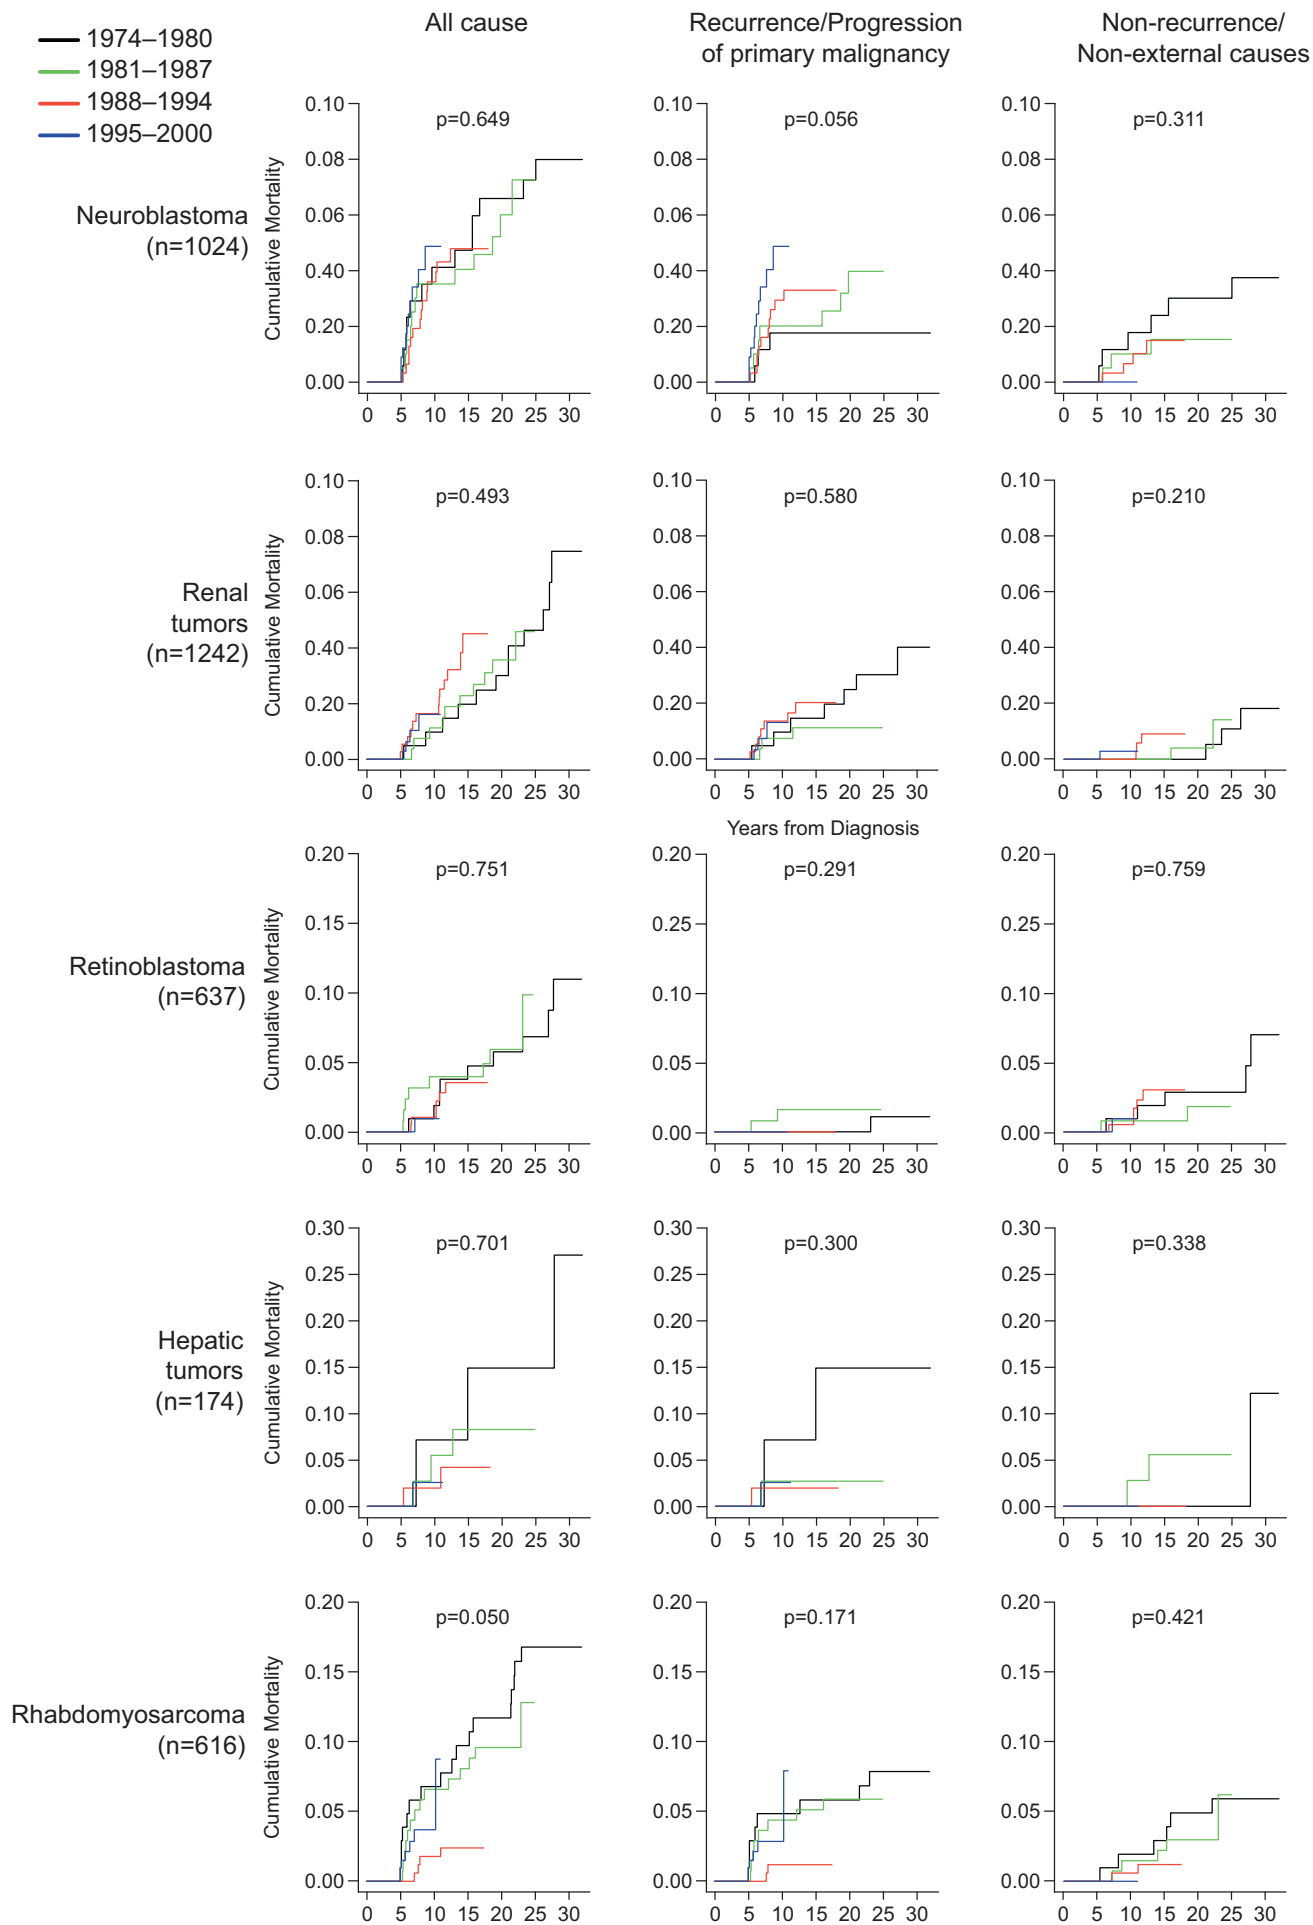

— 1974–1980  
— 1981–1987  
— 1988–1994  
— 1995–2000

Osteosarcoma  
(n=643)

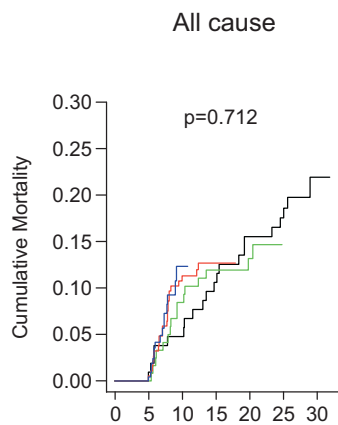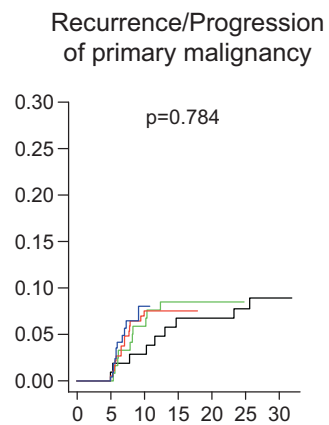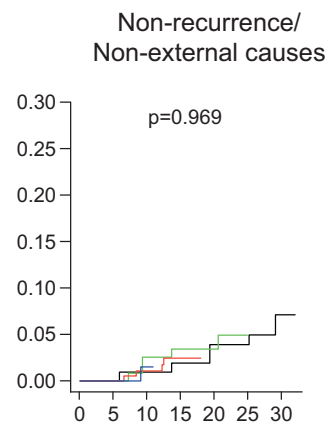

Supplement: supp_JCO.2009.24.4608_Data_Supplement_Figure_1.pdf [file supp_JCO.2009.24.4608_Data_Supplement_Figure_1.pdf]
